# Supplementary material for: Preparation and reactions of 4-oxaspiro[2.3]hexanes
Source: Royal Society of Chemistry journal article supplement (doi:10.1039/b010095l), 2001-01-01
Supplement: b010095l.doc [file b010095l.doc]

**Electronic Supplementary Information**

**General Experimental**

Compound numbers refer to those contained in the main body of the paper. CH2Cl2 was distilled from CaH2. Sodium hydride (NaH) 60% in mineral oil was washed twice with hexanes or toluene prior to use. Toluene and DMF were stored over activated molecular sieves (4 Å). Anhydrous Et2O, benzyl bromide, diethyl zinc, diiodomethane and boron trifluoride diethyl etherate were used as purchased from Aldrich. Literature procedures were followed for the preparations of 3,3-dimethyl-4-phenyloxetan-2-one,13,3-dimethyl-4,4-diphenyloxetan-2-one,1 2-methylene-3-phenyloxetane **1a**,2 3-methyl-2-methylene-3-phenyloxetane **1b**,2 3-allyl-2-methylene-3-phenyloxetane **1c**,2 3,3-dimethyl-2-methylene-4-phenyloxetane **1f**,3 and 3-phenyloxetan-2-one **9.**2

**3-Benzyl-3-phenyloxetan-2-one.** Dry DMF (7 mL) was added to NaH (0.42 g, 18.0 mmol). The mixture was maintained at -78 °C. A solution of 3-phenyloxetan-2-one **9** (2.00 g, 13.5 mmol) in dry DMF (5 mL) was added. Benzyl bromide (3.50 g, 20.3 mmol) in dry DMF (1 mL) was added. The mixture was maintained at -78 °C for 10 min, then transferred to an ice bath to stir for 25 min. The mixture was cooled to -78 °C. Cold Et2O (20 mL) and cold water (30 mL) were added successively. The mixture was allowed to warm to rt. The aqueous layer was extracted with Et2O (20 mL) then chloroform (20 mL). The combined organic extracts were dried (Na2SO4) and concentrated in vacuo. Purification by flash chromatography on silica gel (petroleum ether/ethyl acetate 95:5) afforded 3-benzyl-3-phenyloxetan-2-one(0.96 g, 30%) asa white solid; mp 115 °C (lit.4 mp 124-125 °C); IR (KBr) 1805, 1125, 906, 719 cm-1; 1H NMR (400 MHz, CDCl3)  7-7.5 (m, 10H), 4.52 (s, 2H), 3.42 (d, *J* = 13.9 Hz, 1H), 3.18 (d, *J* = 13.9 Hz, 1H); 13C NMR (400 MHz, CDCl3)  172.4, 137.9, 135.2, 130.4, 129.2, 128.9, 128.3, 127.8, 126.8, 69.8, 66.9, 44.1; MS (EI) *m/z* 208, 194, 179, 116, 103, 91 (100), 77.

**3-Benzyl-2-methylene-3-phenyloxetane (1d)** and **3,3-dimethyl-2-methylene-4,4-diphenyloxetane (1f)** were synthesized using a procedure similar to that of the literature.1

**3-Benzyl-2-methylene-3-phenyloxetane (1d).** Dimethyltitanocene (0.5 M in toluene, 10.8 mL, 5.4 mmol) and 3-benzyl-3-phenyloxetan-2-one (0.64 g, 2.7 mmol) were stirred at 80 °C under N2 in the dark. After the disappearance of the starting material (5 h) the solution was allowed to cool. Petroleum ether (11 mL) was then added, at which point a yellow precipitate formed. The mixture was stirred for 30 min and then passed through Celite with petroleum ether until the filtrate was colorless. The residue was concentrated then purified by flash chromatography on silica gel (petroleum ether/ethyl acetate/triethylamine 98.5:0.5:1), which afforded **1d** (0.40 g, 60%) as a pale yellow oil; IR (film) 1682, 1493, 1176, 960, 771 cm-1; 1H NMR (400 MHz, CDCl3) 7.31-7.13 (m, 8H), 6.91 (m, 2H), 4.88 (d, *J* = 5.0 Hz, 1H), 4.81(d, *J* = 5.0 Hz, 1H), 4.35 (d, *J* = 4.0 Hz, 1H) 3.96 (d, *J* = 4.0 Hz, 1H), 3.38 (d, *J* = 13.4 Hz, 1H), 3.28 (d, *J* = 13.4 Hz, 1H); 13C NMR (400 MHz, CDCl3) 170.7, 142.3, 136.6, 130.8, 128.7, 128.2, 127.3, 127.1, 127.1, 81.6, 79.8, 55.8, 46.9; MS (EI) *m/z* 236 (M+), 206, 145, 115, 103, 91(100), 77; HRMS (FAB) calcd for C17H16O (M+) 236.1202, found 236.1236.

**3,3-Dimethyl-2-methylene-4,4-diphenyloxetane (1f).** The sameprocedure described above was used.Purification by flash chromatography on silica gel (petroleum ether/triethyl amine 99.5:0.5) afforded **1f** (0.36 g, 50%) as a white solid; mp 63 °C; IR (KBr) 2925, 1698, 1195, 917 cm-1; 1H NMR (400 MHz, CDCl3)  7.50-7.20 (m, 10H), 4.27 (d, *J* = 3.7 Hz, 1H), 3.80 (d, *J* = 3.7 Hz, 1H), 1.17 (s, 6H); 13C NMR (400 MHz, CDCl3)  172.1, 142.4, 128.4, 127.4, 126.0, 94.1, 76.4, 51.5, 25.8; MS (EI) *m/z* 250 (M+), 208 (100), 193, 183, 165, 115, 105, 91, 77; HRMS (FAB) calcd for C18H19O (M+ + H) 251.1437, found 251.1423.

**General Procedure for the Preparation of 4-Oxaspiro[2.3]hexanes 5a-f. 6-Phenyl-4-oxaspiro[2.3]hexane (5a).** Anhydrous Et2O (5 mL) was cooled to -15 °C. Neat Et2Zn (0.52 mL, 5.0 mmol) was added via syringe. The cloudy solution was stirred until it was clear (approx. 3 min). CH2I2 (0.81 mL, 10.0 mmol) was added dropwise so as to maintain the reaction temperature at -15 °C. After the addition was complete the mixture was allowed to warm to -5 °C over 10 min. Then, a solution of 2-methylene-3-phenyloxetane **(1a)** (4.00 g, 2.5 mmol) in anhydrous Et2O (1 mL) was added via syringe. The mixture was cooled to -15 °C, then transferred into an ice water bath to stir between 0 and 5 °C for 3 h. The reaction was quenched at 0 °C with saturated NH4Cl and extracted with Et2O (3 x 10 mL). The combined organic extracts were dried (Na2SO4) and concentrated in vacuo. Purification by flash chromatography on silica gel (petroleum ether/ethyl acetate 98:2) afforded **5a** (0.33 g, 83%) as a colorless oil; IR (film)1447, 1187, 1005, 958, 849 cm-1; 1H NMR (400 MHz, CDCl3)  7.25-7.43 (m, 5H), 5.02 (dd, *J* = 8.3 Hz, *J* = 5.7 Hz, 1H), 4.66 (dd, *J* = 6.4 Hz, *J* = 5.7 Hz, 1H), 4.28 (dd, *J* = 8.3 Hz, *J* = 6.4 Hz, 1H), 0.97 (ddd, *J* = 10.9 Hz, *J* = 7.6 Hz, *J* = 6.5 Hz, 1H), 0.76 (ddd, *J* = 10.2 Hz, *J* = 7.4 Hz, *J* = 6.8 Hz, 1H), 0.62 (ddd, *J* = 10. 8 Hz, *J* = 7.5 Hz, *J* = 6.5 Hz, 1H), 0.32 (m, 1H); 13C NMR (400 MHz, CDCl3)  140.1, 128.9, 128.4, 127.6, 75.4, 74.9, 46.5, 11.8, 9.3; MS (EI) *m/z* 160 (M+), 130 (100), 115, 104, 91, 78, 51; HRMS (FAB) calcd for C11H12O (M+) 160.0889, found 160.0840.

**6-Methyl-6-phenyl-4-oxaspiro[2.3]hexane (5b)** was prepared by the above method. The reaction mixture stirred for 4 h at 0 °C and yielded **5b** (0.38 g, 87%) as a colorless oil; IR (film) 1444, 1198, 963, 850, 759 cm-1; 1H NMR (400 MHz, CDCl3)  7.23-7.47 (m, 5H), 4.90 (d, *J* = 5.2 Hz, 1H), 4.62 (d, *J* = 5.2 Hz, 1H), 1.73 (s, 3H), 0.81 (m, 2H), 0.68 (m, 1H), 0.35 (m, 1H); 13C NMR (400 MHz, CDCl3)  144.1, 128.6, 127.0, 126.5, 81.4, 79.9, 45.2, 23.3, 10.6, 8.9; MS (EI) *m/z* 174 (M+), 159, 144, 129 (100), 117, 103, 91, 77, 51; Anal Calcd for C12H14O: C, 82.72; H, 8.1. Found: C, 82.47; H, 7.80.

**6-Allyl-6-phenyl-4-oxaspiro[2.3]hexane** **(5c)** was prepared by the above method. The reaction mixture stirred at 0 °C for 4 h and yielded **5c** (0.45 g, 90%) as a colorless oil; IR (film) 1445, 1193, 966, 760 cm-1; 1H NMR (400 MHz, CDCl3)  7.15-7.39 (m, 5H), 5.73 (m, 1H), 5.13 (m, 2H), 5.04 (d, *J* = 5.5 Hz, 1H), 4.66 (d, *J* = 5.5 Hz, 1H), 3.03 (m, 1H), 2.72 (m, 1H), 0.81 (m, 2H), 0.69 (m, 1H), 0.48 (m, 1H); 13C NMR (400 MHz, CDCl3)  142.4, 134.2, 128.8, 126.9, 126.7, 118.6, 78.5, 76.2, 49.0, 42.3, 9.7, 8.3; MS (EI) *m/z* 199 (M+ - H), 129, 118, 103 (100), 91, 77, 51; HRMS (FAB) calcd for C14H17O (M+ + H) 201.1280, found 201.1278.

**6-Benzyl-6-phenyl-4-oxaspiro[2.3]hexanes** **(5d)** was prepared by the above method. The reaction mixture stirred at 0 °C for 3. 5 h and yielded **5d** (0.51 g, 82%) as a colorless oil; IR (film) 1448, 1195, 962, 844, 768 cm-1; 1H NMR (400 MHz, CDCl3)  6.76-7.34 (m, 10H), 5.06 (d, *J* = 5.6 Hz, 1 H), 4.75 (d, *J* = 5.6 Hz, 1H), 3.75 (d, *J* = 14.1 Hz, 1H), 3.24 (d, *J* = 14.1 Hz, 1H), 0.91 (m, 2H), 0.70 (m, 2H); 13C NMR (400 MHz, CDCl3)  142.3, 137.6, 130.2, 128.7, 128.3, 127.1, 126.9, 126.6, 79.0, 75.4, 50.7, 44.9, 9.7, 7.9; MS (EI) *m/z* 250 (M+), 232, 193, 159, 131, 115, 103, 91 (100), 77; Anal. Calcd for C18H18O: C, 86.36, H, 7.25. Found: C, 86.76; H, 7.35.

**6,6-Dimethyl-5-phenyl-4-oxaspiro[2.3]hexane** **(5e)** was prepared by the above method. The reaction stirred at 0 °C for 3 h and yielded **5e** (0.38 g, 81%) as a colorless oil; IR (film) 2955, 1462, 1192, 1002 cm-1; 1H NMR (400 MHz, CDCl3)  7.30 (m, 5H), 5.50 (s, 1H), 1.36 (s, 3H), 0.83 (m, 2H), 0.68 (s, 3H), 0.67 (m, 1H), 0.50 (m, 1H); 13C NMR (400 MHz, CDCl3)  140.4, 128.5, 127.7, 125.9, 89.4, 76.1, 41.9, 26.0, 21.1, 7.9, 7.8; MS (EI) *m/z* 188 (M+), 132, 117 (100), 91, 77, 67, 56; Anal. Calcd for C13H16O: C 82.93; H, 8.57. Found: C, 82.79; H, 8.51.

**6,6-Dimethyl-5,5-diphenyl-4-oxaspiro[2.3]hexane (5f)** was prepared by the above method. The reaction stirred at 0 °C for 3 h. A solid was isolated upon concentration of the dried organic layers. Recrystallization in petroleum ether/ethyl acetate (98:2) afforded **5f** (0.65 g, 98%) as a white solid; mp 132 °C; IR (KBr) 1446, 974 cm-1; 1H NMR (400 MHz, CDCl3)  7.23-7.57 (m, 10H), 1.03 (s, 6H), 0.86 (t, *J* = 7.2 Hz, 2H), 0.54 (t, *J* = 7.2 Hz, 2H); 13C NMR (400 MHz, CDCl3) 144.6, 128.2, 126.9, 126.1, 91.9, 73.7, 45.6, 24.5, 7.5; MS (EI) *m/z* 264 (M+), 208, 193 (100), 183, 165, 129, 115, 105, 77; HRMS (FAB) calcd for C19H20O (M+) 264.1515, found 264.1543.

**Reaction of 4-Oxaspiro[2.3]hexanes with BF3.Et2O: Preparation of Cyclopentanone, Cyclobutanone and 4-Methylenetetrahydrofuran derivatives.**

**General procedure. 2-Benzylcyclobutanone (19).** 6-Phenyl-4-oxaspiro[2.3]hexane **5a** (0.25 g, 1.6 mmol) was dissolved in dry CH2Cl2 (5 mL). BF3.Et2O (0.96 mL, 7.80 mmol) was added. The reaction was allowed to run at 35 °C for 17 h after which it was quenched at 0 °C with a solution of saturated Na2CO3 (2 mL) and extracted with Et2O (5 x 5 mL). The combined organic extracts were dried (Na2SO4) and concentrated *in vacuo*. Purification by flash chromatography on silica gel (petroleum ether/ethyl acetate 98:2) afforded **19** (0.087 g, 35%) as a colorless oil; IR (film) 1774, 1495, 1453, 1080 cm-1; 1H NMR (400 MHz, CDCl3)  7.31-7.17 (m, 5H), 3.62 (m, 1H), 3.03 (m, 2H), 2.87 (m, 2H), 2.18 (m, 1H), 1.76 (m, 1H); 13C NMR (400 MHz, CDCl3)  211.1, 139.3, 129.1, 128.9, 126.7, 61.6, 44.9, 35.6, 17.0; MS (EI) *m/z* 160 (M+), 131, 118, 117 (100), 104, 91, 77; HRMS (EI) calcd for C11H13O (M+ + H) 161.0967, found 161.0971.

**2-Benzyl-2-methylcyclobutanone (20)** was prepared by the above method and yielded **20** (0.014 g, 5%) as a yellowish oil; IR (film) 1773, 1451, 1057 cm-1; 1H NMR (400 MHz, CDCl3)  7.16-7.35 (m, 5H), 2.97 (m, 2H), 2.68 (m, 2H), 2.07 (m, 1H), 1.72 (m, 1H), 1.23 (s, 3H); 13C NMR (400 MHz, CDCl3)  215.6, 137.9, 130.3, 128.7, 126.9, 65.3, 42.9, 42.3, 23.5, 21.9; MS (EI) *m/z* 174 (M+), 132, 117 (100), 105, 91, 65, 51; HRMS (FAB) calcd for C12H15O (M+ + H) 175.1124, found 175.1111.

**3-Allyl-4-methylene-3-phenyltetrahydrofuran (21)** was prepared by the above method. The reaction stirred at 70 °C for 13 h. Purification by flash chromatography on silica gel (petroleum ether/ethyl acetate 98:2), followed by further purification on a preparative TLC plate (petroleum ether/ethyl acetate 98.5:1.5) afforded **21** (0.022 g, 7%) as yellowish oil, mixture (3.4/1) of the structural isomers **21**/**25** as determined by 1H NMR; IR (film) of the mixture 1772 (C=O from **25**), 1494, 1444, 1638, 1067, 914 cm-1; 1HNMR (400 MHz, CDCl3) of **21**  7.44-7.16 (m, 5H), 5.71 (m, 1H), 5.10 (m, 4H), 4.48 (s, 2H), 4.25 (d, *J* = 8.9 Hz, 1H), 3.95 (d, *J* = 8.9 Hz, 1H), 2.78 (dd, *J =* 14.0 Hz, *J =* 7.0 Hz, 1H), 2.62 (dd, *J =* 14.3 Hz, *J =* 7.0 Hz, 1H); 13C NMR (400 MHz, CDCl3) of **21**  154.1, 143.6, 134.7, 128.5, 127.0, 126.6, 118.0, 106.0, 79.2, 72.5, 53.6, 42.2; MS (EI) *m/z* of **21** 199 (M+ - H), 172, 159, 131, 129, 115, 91 (100) 77; HRMS (FAB) calcd for C14H17O (M+ + H) 201.1280, found 201.1274. **2-Allyl-2-benzylcyclobutanone (25).**  1HNMR (400 MHz, CDCl3)  7.45-7.18 (m, 5H), 5.85 (m, 1H), 5.07 (m, 2H), 2.97 (d, *J =* 13.8 Hz, 1H), 2.72 (d, *J =* 13.8 Hz, 1H), 2.50 (m, 2H), 2.38 (dd, *J =* 13.8 Hz, *J =* 7.0 Hz, 1H), 2.72 (dd, *J =* 13.8 Hz, *J =* 7.5 Hz, 1H), 1.91 (m, 2H); 13C NMR (400 MHz, CDCl3)  214.9, 137.5, 133.4, 130.2, 128.5, 126.7, 118.9, 68.6, 43.0, 40.5, 39.7, 20.0; MS (EI) *m/z* 200 (M+) 200, 143, 129, 117, 91 (100), 65.

**3-Benzyl-4-methylene-3-phenyltetrahydrofuran (22)** was prepared by the above method. The reaction stirred at 35 °C for 35 hours. Purification by flash chromatography on silica gel (petroleum ether/ethyl acetate 98:2) afforded **22** (0.062 g, 16%) as a colorless oil; IR (film) 1600, 1494, 1068, 892 cm-1; 1H NMR (400 MHz, CDCl3)  7.31-7.12 (m, 8H), 6.84 (m, 2H), 5.21 (s, 1H), 5.13 (s, 1H), 4.40 (s, 2H), 4.25 (d, *J* = 9.0 Hz, 1H), 4.00 (d, *J* = 9.0 Hz, 1H), 3.30 (d, J = 13.6 Hz, 1H), 3.15 (d, *J* = 13.6 Hz, 1H); 13C NMR (400 MHz, CDCl3)  154.2, 142.7, 138.2, 130.5, 128.6, 128.2, 127.5, 127.0, 126.8, 106.2, 78.0, 72.5, 55.0, 44.8; MS (EI) *m/z* 250 (M+), 159, 145, 131, 115, 104, 91 (100); HRMS (FAB) calcd for C18H19O (M+ + H) 251.1437, found 251.1477.

**2-(1-Methyl-1-phenylethyl)cyclobutanone (23)** was prepared by the above method. The reaction stirred at 0 °C for 2 hours. Purification by flash chromatography (petroleum ether/ethyl acetate 99.5:0.5) afforded **23** (0.14 g, 48%) as a colorless oil; IR (film) 1771, 1081, 762 cm-1; 1H NMR (400 MHz, CDCl3)  7.36-7.20 (m, 5H), 3.60 (m, 1H), 2.84 (m, 1H), 2.65 (m, 1H), 1.95 (m, 1H), 1.73 (m, 1H); 1.45 (s, 6H); 13C NMR (400 MHz, CDCl3)  211.4, 147.4, 128.6, 126.5, 126.4, 71.5, 44.5, 39.5, 28.4, 24.8, 14.0; MS (EI) *m/z* 188 (M+), 145, 131 (100), 117, 91; HRMS (FAB) calcd for C13H17O (M+ + H) 189.1280, found 189.1270.

**2,2-Dimethyl-3,3-diphenylpentanone (24)** was prepared by the above method. The mixture stirred at 0 °C for 2 h. Purification by flash chromatography (petroleum ether/ethyl acetate 99.5:0.5) afforded **24** (0.17 g, 42%) as colorless oil which crystallized on setting; mp 83 °C; IR (KBr) 2953, 1738, 1492, 1108 cm-1, 1H NMR (400 MHz, CDCl3)  7.31-7.17 (m, 10H), 2.54 (t, *J* = 7.9 Hz, 2H), 2.18 (t, *J* = 7.9 Hz, 2H), 1.14 (s, 6H); 13C NMR (400 MHz, CDCl3)  216.8, 142.1, 130.9, 128.0, 126.7, 70.0, 44.2, 35.7, 34.3, 27.2; MS (EI) *m/z* 264 (M+), 194, 178, 166, 165 (100), 131, 115, 91; HRMS (FAB) calcd for C19H20O (M+) 264.1515, found 264.1549.

**References**

1. W. Adam, J. Baeza, and J.-C. Liu, *J. Am. Chem. Soc.,* 1972, **94**, 2000.
2. L. M. Dollinger, A. J. Ndakala, A, M. Hashemzadeh, G. Wang, Y. Wang, I. Martinez, J. T. Arcari, D. J. Galluzzo, D. A. R. Howell, A. L. Rheingold, and J. S. Figuero, *J. Org. Chem.,* 1999, **64**, 7074.
3. M. Hashemzadeh and A. R. Howell, *Tetrahedron Lett.,* 2000, **41**, 1855.
4. a) E. Testa, L. Fontanella, G. Cristiani, and F. Fava, *Justus Liebigs Ann. Chem.,* 1958, **619**, 47; b) E. Testa, L. Fontanella, G. Cristiani, and F. Fava, *Justus Liebigs Ann. Chem.,* 1961, **639**, 166; c) B.J. R. Nicolaus, L. Mariani, and E. Testa, *Helv. Chim. Acta.,* 1961, **44**, 1076.
